# Supplementary material for: RAB35 is required for murine hippocampal development and functions by regulating neuronal cell distribution
Source: PubMed Central journal article supplement (PMC10121692; doi:10.1038/s42003-023-04826-x), 2023-04-21
Supplement: 42003_2023_4826_MOESM2_ESM.pdf [file 42003_2023_4826_MOESM2_ESM.pdf]

## Description of Additional Supplementary Files

**File name:** Supplementary Data 1

**Description:** Proteins dysregulated in the Rab35 cKO P0 hippocampus.

**File name:** Supplementary Data 2

**Description:** Source data for graphs presented in the paper.
